# Supplementary material
Source: publisher figshare collection journal article supplement (https://diabetesjournals.figshare.com/articles/dataset/_/24539407)
Supplement: Supplementary file 4 [file 1]

Supplemental Table S1

|                                  | Stage 0 (without cortical fracture)                                                                                                              | Stage 1 (with cortical fracture)                                                                                                                                          |
|----------------------------------|--------------------------------------------------------------------------------------------------------------------------------------------------|---------------------------------------------------------------------------------------------------------------------------------------------------------------------------|
| Active arthropathy (acute stage) | Mild inflammation / soft tissue oedema<br>No skeletal deformity<br>X-ray normal<br>MRI abnormal (bone marrow edema, bone bruise, microfractures) | Severe inflammation / soft tissue edema<br>Severe skeletal deformity<br>X-ray abnormal (macrofractures)<br>MRI abnormal (bone marrow oedema, bone bruise, macrofractures) |
| Inactive arthropathy             | No inflammation<br>No skeletal deformity<br>X-ray normal<br>MRI without significant bone marrow edema                                            | No inflammation<br>Severe skeletal deformity<br>X-ray abnormal (past macrofractures)<br>MRI without significant bone marrow edema                                         |

Table Legend:

The CF stage classification proposed by Chantelau and Grützner [17].

Supplemental Table S2

|                                      | N patients    | Recurrence within category | Recurrence in others | Hazard Ratio     | p value | HR, multivariate model *    |
|--------------------------------------|---------------|----------------------------|----------------------|------------------|---------|-----------------------------|
| Age 18-59 years                      | 83/174 (48%)  | 30 (36%)                   | 20 (22%)             | 1.77 (1.00-3.11) | 0.049   | 1.36 (0.71-2.59, $p=0.35$ ) |
| Male sex                             | 109/174 (63%) | 29 (27%)                   | 21 (32%)             | 0.84 (0.48-1.48) | 0.55    |                             |
| Type 1 DM                            | 63/174 (36%)  | 19 (30%)                   | 31 (28%)             | 0.93 (0.52-1.64) | 0.80    |                             |
| Hypertension                         | 135/172 (78%) | 37 (27%)                   | 12 (32%)             | 0.77 (0.40-1.49) | 0.44    |                             |
| Ischemic heart disease               | 23/174 (13%)  | 3 (13%)                    | 47 (31%)             | 0.36 (0.11-1.17) | 0.09    | 0.43 (0.13-1.43, $p=0.17$ ) |
| eGFR < 60 ml/min/1.73 m <sup>2</sup> | 71/172 (41%)  | 19 (27%)                   | 30 (30%)             | 0.90 (0.50-1.59) | 0.71    |                             |
| HbA1c > 70 mmol/mol                  | 61/164 (37%)  | 24 (39%)                   | 21 (20%)             | 2.13 (1.19-3.84) | 0.01    | 2.16 (1.17-4.00, $p=0.01$ ) |
| Previous DFU                         | 82/174 (47%)  | 18 (22%)                   | 32 (35%)             | 0.59 (0.33-1.04) | 0.07    | 0.55 (0.30-1.01, $p=0.06$ ) |
| PAD                                  | 29/174 (17%)  | 7 (24%)                    | 43 (30%)             | 0.81 (0.36-1.79) | 0.60    |                             |
| Osteoporosis                         | 6/174 (3.4%)  | 0                          | 50 (30%)             | 0.05 (0.01-24)   | 0.34    |                             |
| Dialysis                             | 8/174 (4.6%)  | 2 (25%)                    | 48 (29%)             | 0.92 (0.23-3.84) | 0.92    |                             |
| Kidney transplant                    | 10/174 (5.7%) | 1 (10%)                    | 50 (30%)             | 0.28 (0.04-2.01) | 0.20    |                             |
| CF stage 1 <sup>†</sup>              | 116/187 (62%) | 36 (31%)                   | 17 (24%)             | 1.34 (0.76-2.39) | 0.31    |                             |

Table Legend:

Acute recurrence after uncasting (occurring < 1 year after introduction of definitive therapeutic footwear or discharge), divided according to different baseline characteristics and CF stage.

\*  $\chi^2$  15.1,  $p < 0.01$ .

† Includes first occurring contralateral CF events in the univariable analysis.

Supplemental Table S3

|                                      | N patients    | Recurrence within category | Recurrence in others | Hazard Ratio     | <i>p</i> value | HR, multivariate model *        |
|--------------------------------------|---------------|----------------------------|----------------------|------------------|----------------|---------------------------------|
| Age 18-59 years                      | 86/183 (47%)  | 7 (8.1%)                   | 6 (6.1%)             | 1.23 (0.41-3.67) | 0.71           |                                 |
| Male sex                             | 114/183 (62%) | 8 (7.0%)                   | 5 (7.2%)             | 1.06 (0.35-3.24) | 0.92           |                                 |
| Type 1 DM                            | 67/183 (37%)  | 6 (8.9%)                   | 7 (6.0%)             | 0.84 (0.28-2.52) | 0.75           |                                 |
| Hypertension                         | 142/181 (79%) | 11 (7.7%)                  | 2 (5.1%)             | 1.49 (0.33-6.73) | 0.60           |                                 |
| Ischemic heart disease               | 23/183 (13%)  | 0                          | 13 (8.1%)            | 0.04 (0.01-73)   | 0.40           |                                 |
| eGFR < 60 ml/min/1.73 m <sup>2</sup> | 76/181 (42%)  | 6 (7.9%)                   | 7 (6.7%)             | 1.56 (0.52-4.67) | 0.43           |                                 |
| HbA1c > 70 mmol/mol                  | 66/173 (38%)  | 2 (3.0%)                   | 11 (10.2%)           | 0.29 (0.07-1.32) | 0.11           |                                 |
| Previous DFU                         | 88/183 (48%)  | 4 (4.5%)                   | 9 (9.4%)             | 0.57 (0.18-1.85) | 0.35           |                                 |
| PAD                                  | 32/183 (17%)  | 2 (6.2%)                   | 11 (7.3%)            | 0.94 (0.21-4.27) | 0.94           |                                 |
| Osteoporosis                         | 6/183 (3.2%)  | 1 (17%)                    | 4 (6.7%)             | 3.56 (0.46-28)   | 0.23           |                                 |
| Dialysis                             | 9/183 (4.9%)  | 1 (11%)                    | 12 (7.3%)            | 1.89 (0.25-15)   | 0.54           |                                 |
| Kidney transplant                    | 10/183 (5.5%) | 3 (30%)                    | 10 (5.8%)            | 6.17 (1.69-22)   | 0.006          | 5.95 (1.63-22, <i>p</i> =0.007) |
| CF stage 1 <sup>†</sup>              | 124/197 (63%) | 12 (9.7%)                  | 2 (2.7%)             | 4.36 (0.97-20)   | 0.05           | 8.36 (1.08-64, <i>p</i> =0.04)  |

## Table Legend:

Ipsilateral recurrence regarded as new CF events (occurring ≥ 1 year after introduced definitive therapeutic footwear or discharge), divided according to different baseline characteristics and CF stage.

\*  $\chi^2$  15.6, *p* < 0.001

† Includes first occurring contralateral CF events in the univariable analysis.
